# Supplementary material
Source: publisher site journal article supplement (https://www.dovepress.com/article/283486)
Supplement: Supplementary file 1 [file get_supplementary_file.php]

**A**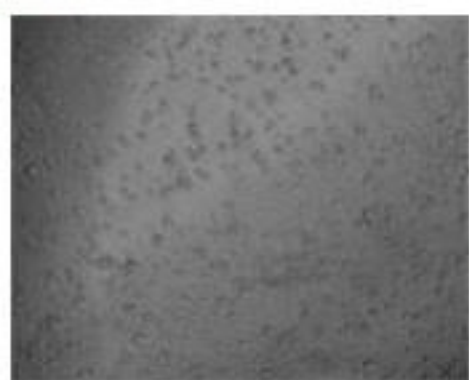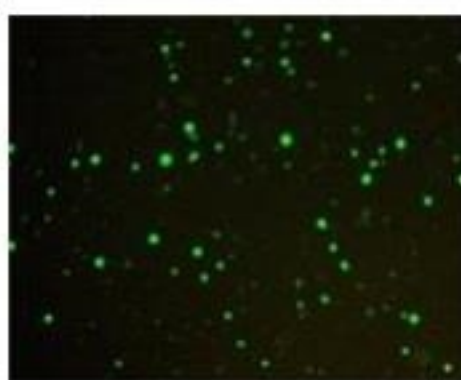

miRNA-223-3p OE  
Granta-519 cells

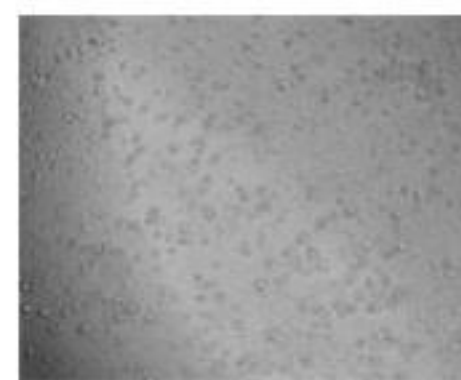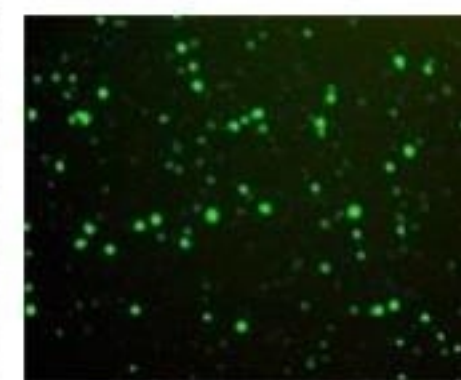

miRNA-223-3p OE  
Jeko-1 cells

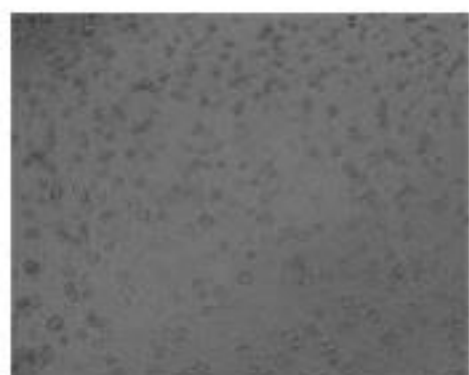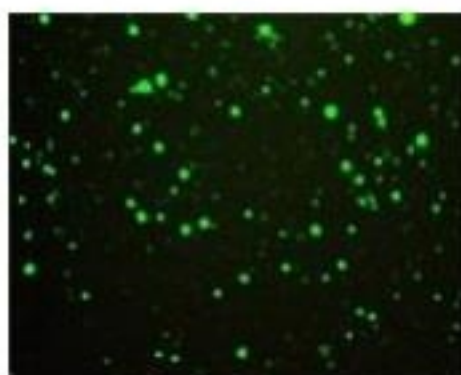

miRNA-223-3p KD  
Granta-519 cells

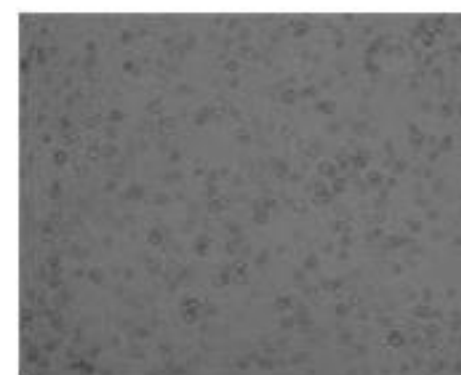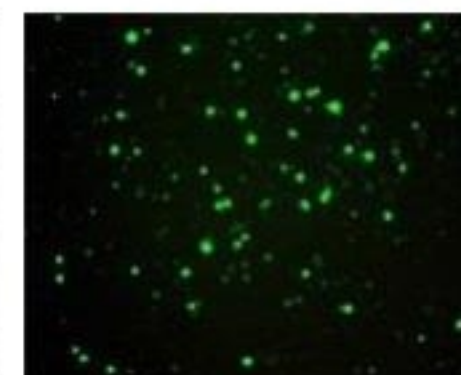

miRNA-223-3p KD  
Jeko-1 cells

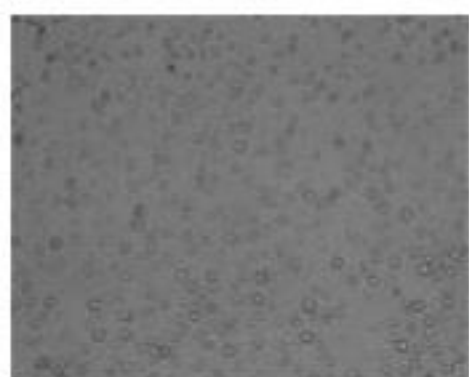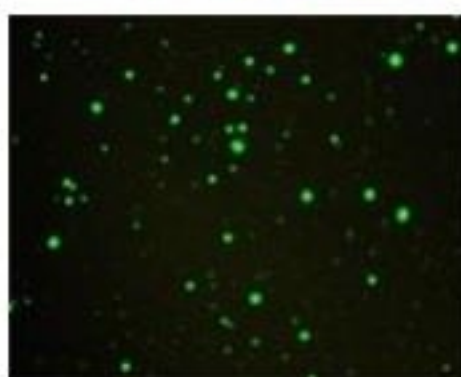

NC  
Granta-519 cells

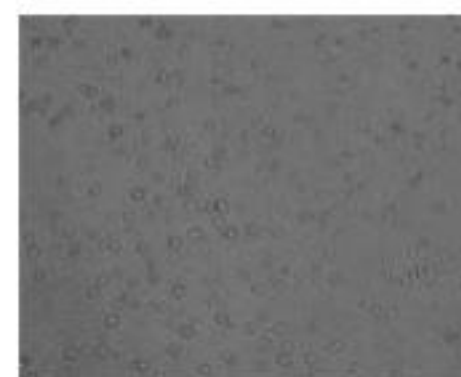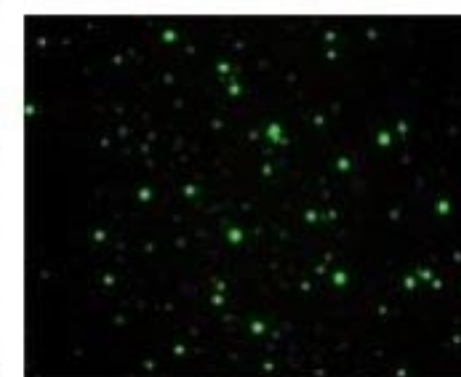

NC  
Jeko-1 cells

**B**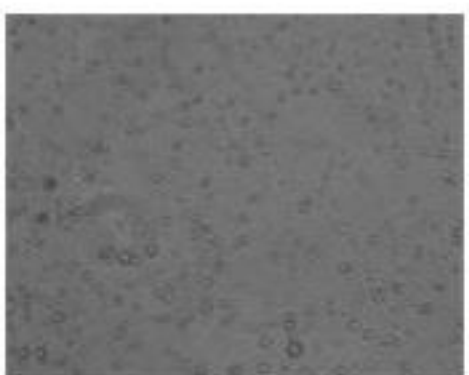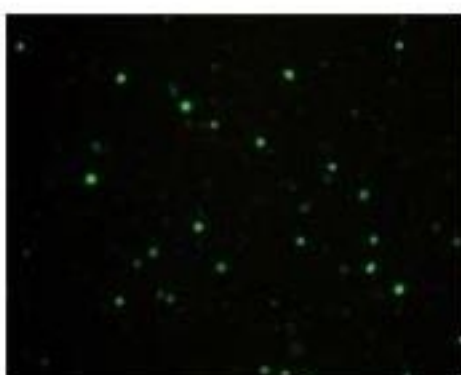

CHUK OE  
Granta-519 cells

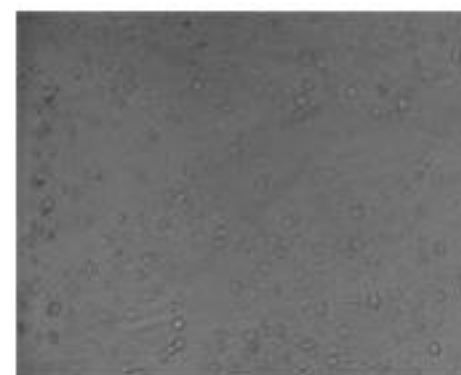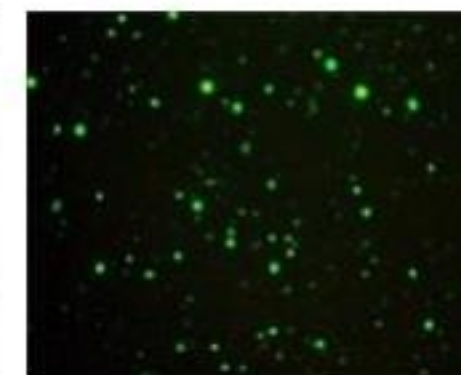

CHUK OE  
Jeko-1 cells

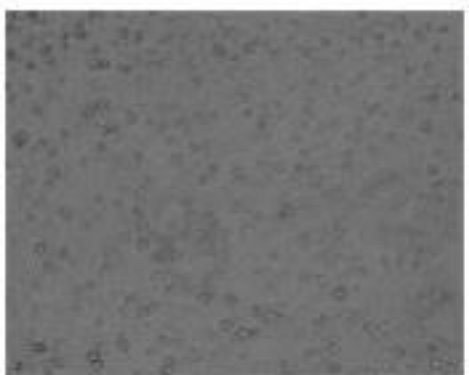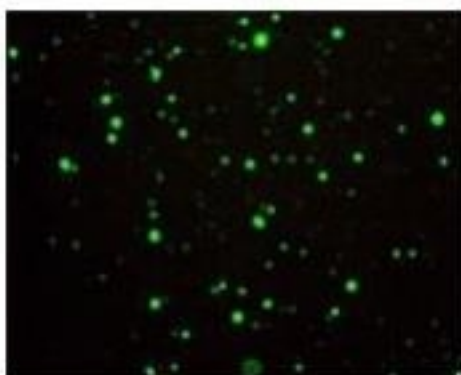

CHUK KD  
Granta-519 cells

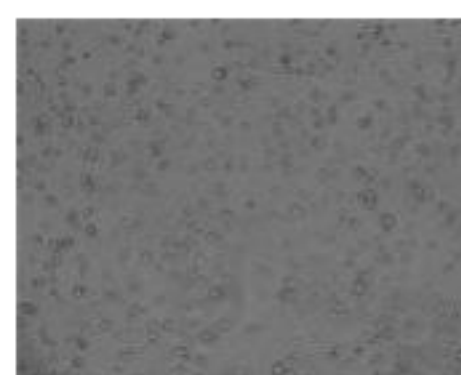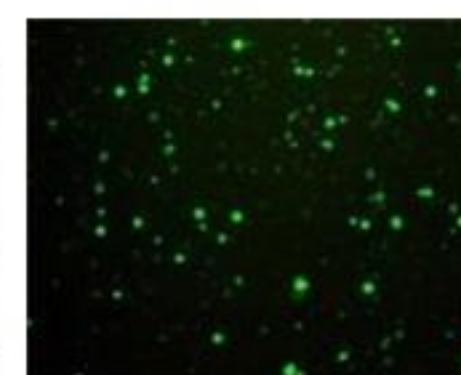

CHUK KD  
Jeko-1 cells

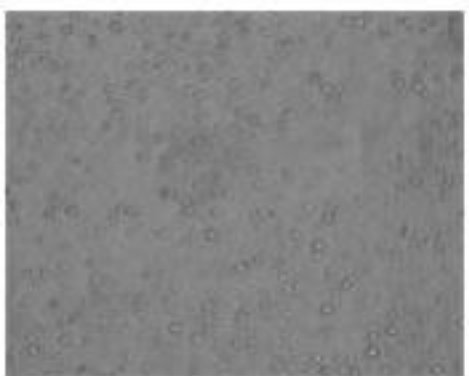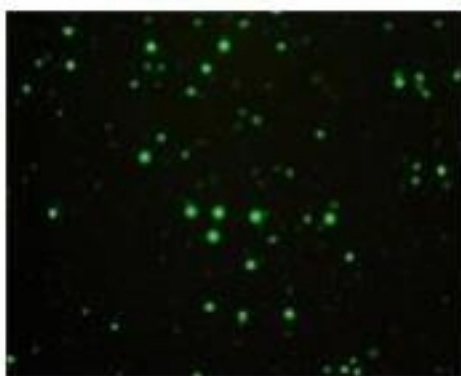

NC  
Granta-519 cells

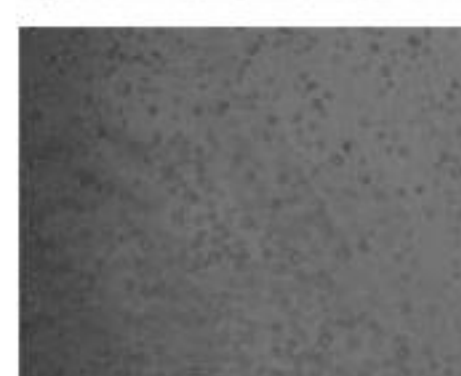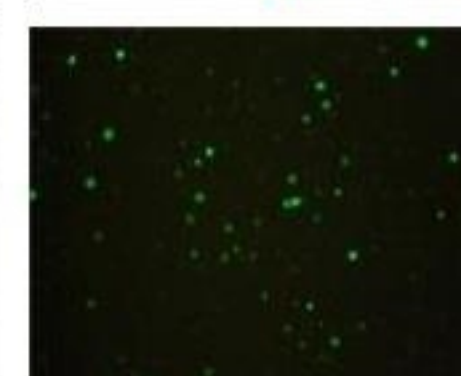

NC  
Jeko-1 cells

Supplementary Figure 1 Transfection efficacies detected by fluorescence microscope.

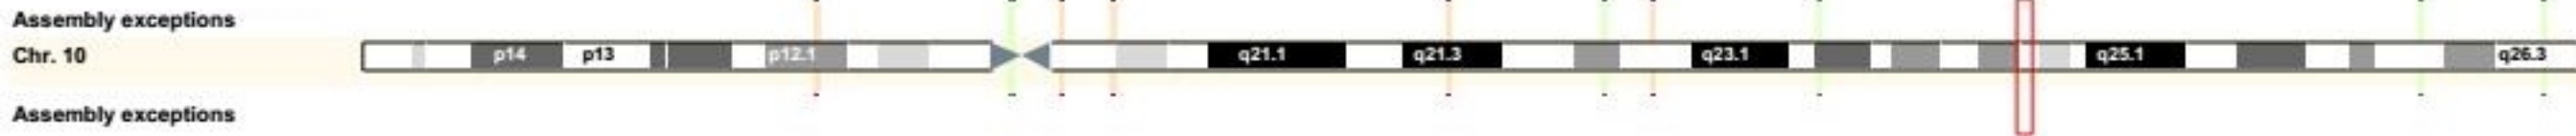

Supplementary Figure 2 MiRNA-223-3p binding site in CHUK 3'UTR region.
